1  
2  
3  
4  
5  
6  
7  
8  
9  
10  
11  
12  
13  
14  
15  
16  
17  
18  
19  
20  
21  
22  
23  
24

# EMS injury cause codes more accurate than emergency department visit ICD-10-CM codes for firearm injury intent in North Carolina

Nicole L. Snyder<sup>1</sup>, Amy Ising<sup>1\*</sup>, Anna E. Waller<sup>1</sup>

<sup>1</sup> Carolina Center for Health Informatics in the Department of Emergency Medicine, School of Medicine, University of North Carolina at Chapel Hill.

\*Corresponding author  
E-mail: amy\_ising@med.unc.edu (AI)

## 25 **Abstract**

### 26 **Background**

27 The timeliness, accuracy, and completeness of data for firearm injury surveillance is crucial for  
28 public health surveillance efforts and informing injury prevention measures. While emergency  
29 department (ED) visit data can provide near real-time information on firearms injuries, there are  
30 concerns surrounding the accuracy of intent coding in these data. We examined whether  
31 emergency medical service (EMS) data provide more accurate firearm injury intent coding in  
32 comparison to ED data.

### 33 **Methods**

34 We applied a firearm injury definition to EMS encounter data in NC's statewide syndromic  
35 surveillance system (NC DETECT), from January 1, 2021, through December 31, 2022. Each  
36 record was manually reviewed to determine shooter and intent, and the corresponding manual  
37 classifications were compared to the injury cause codes entered in the EMS data and to ED visit  
38 records, where linkage was possible.

### 39 **Results**

40 We identified 9557 EMS encounters from January 1, 2021, through December 31, 2022 meeting  
41 our firearm injury definition. After removing false positives and duplicates, 8584 records were  
42 available for manual injury classification. Overall, our analysis demonstrated that manual and  
43 EMS injury cause code classification were comparable. However, for the 3401 EMS encounters  
44 that could be linked to an ED visit record, only 18.3% (n = 355) of the 1945 assaults and 22.2%  
45 (n = 38) of the 171 intentional self-harm suicide encounters we identified in the EMS records were  
46 identified as assault firearm injures in the ED visit data. This demonstrates a marked difference  
47 in the intent coding between the two data sources.

### 48 **Conclusions**

49 This study illustrates both the value of examining EMS encounters for firearm injury intent, and  
50 the challenges of accurate intent coding in the ED setting. The results also suggest the importance  
51 of developing better guidance around intent coding for firearm injuries in the ED.

52

53

54

55

56

57

58

## 59 **Introduction**

60 As firearm injury continues to be a significant cause of morbidity and mortality in the United States  
61 (US), public health researchers continue to seek improvements to the timeliness, accuracy, and  
62 completeness of firearm injury surveillance [1]. In North Carolina (NC), firearm injury surveillance  
63 relies primarily on the NC Violent Death Reporting System (NC-VDRS), hospital administrative  
64 data, and syndromic surveillance emergency department visit data [2]. While the syndromic  
65 surveillance emergency department (ED) visit data provides near real time information on nonfatal  
66 firearm injury in NC, there are concerns about accuracy when subtyping firearm injuries by intent  
67 (assault, unintentional, intentional self-harm). For example, while some studies estimate  
68 unintentional firearm injury to represent 16% or less of all nonfatal firearm injury, approximately  
69 60% of ED firearm visits in NC are identified as unintentional [3, 4]. Several other studies that  
70 have documented these coding intent discrepancies and the potential overclassification of  
71 nonfatal firearm injury as unintentional, relied on urban, Level I Trauma center data from a small  
72 number of hospitals [5, 6]. For comparison, we aimed to quantify any coding intent discrepancies  
73 using data from a statewide system in a predominantly rural state. To achieve this, we compared  
74 firearm injury intent classifications as identified in statewide emergency medical services (EMS)  
75 encounter data to the firearm injury intent classifications identified in syndromic surveillance ED  
76 visit data, for those patients transported to the ED by EMS. We specifically chose to examine  
77 EMS data because EMS narratives provide rich contextual details on the entire EMS encounter  
78 and can, therefore, provide insights into firearm injury intent.

## 79 **Methods**

80 We conducted this evaluation in several steps. First, we applied a firearm injury definition to EMS  
81 encounter data for encounters sent to NC DETECT, NC's statewide syndromic surveillance  
82 system, from January 1, 2021 through December 31, 2022. We then manually reviewed each

83 record and documented shooter and intent. Third, we compared manual intent classifications to  
84 those documented in the EMS data based solely on injury cause code. Finally, we linked the EMS  
85 records to corresponding ED visit records, where possible, to compare our manually assigned  
86 intent classifications to the intent coding in the ED visit data. The UNC IRB determined this study  
87 to be exempt from full review.

88

## 89 **EMS firearm V1 definition**

90 The EMS firearm definition we used for this analysis is outlined in Table 1. It searches the  
91 complaint for gunshot wound related injuries OR the injury cause field for firearm-related ICD-10-  
92 CM codes. The definition also searches for gunshot wound related injuries in the narrative if the  
93 dispatch complaint is *Stab/Gunshot Wound/Penetrating Trauma*. This initial definition was  
94 designed to maximize sensitivity, while excluding EMS encounters that are not for active  
95 responses based on EMS patient disposition.

96

97 **Table 1. EMS Firearm V1 Definition.**

|                                  |                                                                                                                                                                                                                                                                                                                    |
|----------------------------------|--------------------------------------------------------------------------------------------------------------------------------------------------------------------------------------------------------------------------------------------------------------------------------------------------------------------|
| Complaint Terms                  | GSW or gunshot or "gun shot" or "shot myself" or "shot self*" or firearm or "I got shot" or "been shot" or "shot gun" or shotgun                                                                                                                                                                                   |
| Injury cause codes               | W34, W34.0, W34.09, W34.00, W34.00XA, W33.02, W33.03, W33.09, W33.01, W32.0, W32, W34.1, W33.0, W33, X94.0XXA, X95.9, X95.9XXA, Y22, Y22.XXXA, Y23.1, X72.XXXA, X74.9, Y35.0, Y35.02, Y35.023, Y35.03, Y35.092, Y35.093, Y35.003, Y23.3, Y22.0, Y24.8, Y23.8, Y23, Y23.0, Y23.0XXA, Y38.4X, Y24.9, Y24.9XXA, Y23.9 |
| Dispatch complaint AND narrative | dispatch complaint is <i>Stab/Gunshot Wound/Penetrating Trauma</i> AND narrative keywords of GSW or gun shot or gunshot                                                                                                                                                                                            |
| Patient disposition exclusions   | Assist, Agency; Assist, Public, Assist; Unit, Canceled (Prior to Arrival At Scene); Canceled on Scene (No Patient Contact); Canceled on Scene (No Patient Found); Standby-No Services or Support Provided; Standby-Public Safety, Fire, or EMS Operational Support Provided; Transport Non-Patient, Organs, etc.   |

98

## 99 **EMS encounter manual review**

100 With approval from the NC Office of Emergency Medical Services, we downloaded all EMS  
101 encounters from January 1, 2021 through December 31, 2022 meeting the firearm v1 definition  
102 from NC's statewide syndromic surveillance system NC DETECT on February 1, 2023 with an  
103 update to incorporate additional records on May 1, 2023[7]. The authors did not have access to  
104 any information that could identify individual participants during or after data collection. For each  
105 EMS encounter, we manually documented the shooter (self, other, unknown) and intent  
106 (intentional, unintentional, undetermined) in a spreadsheet, which we also collapsed into the  
107 categories used in injury intent coding in the International Classification of Diseases: assault  
108 (other – intentional), self-inflicted (self – intentional), unintentional (other, unknown, and self) and  
109 undetermined (other, unknown, and self). We also indicated false positives. We then added notes,  
110 as needed, to document our rationale for any of these classifications. EMS encounters were  
111 reviewed by only one person, but all challenging EMS encounters were reviewed by three  
112 reviewers to achieve consensus on coding. We included both non-fatal and fatal firearm injuries  
113 in our review. Additional decision points are listed below:

- 114 • Intent was assigned using complaint, narrative, and injury cause code fields. Sometimes  
115 these fields provided conflicting information. When that occurred, the reviewer used group  
116 consensus to determine intent.
- 117 • If injury cause was coded as undetermined, a more precise intent may have been assigned  
118 based on the narrative description.
- 119 • When the narrative described an incident as a drive-by shooting or shot by someone else  
120 while in a car with no documented/undetermined injury cause, intent was classified as  
121 assault.
- 122 • If a patient was transported to an ED by EMS, stabilized, and then transferred by EMS to  
123 another ED, both EMS encounters were coded.

- 124       • For deaths at the scene with inconclusive intent in the EMS record, death certificate data  
125           were consulted to determine intent, if a linkage could be identified based on patient age,  
126           sex, race, county of residence and date of death.

127

## 128 **False positives**

129 We excluded any encounters identified by the firearm v.1 definition that described injuries caused  
130 by bb guns, pellet guns, nail guns, air guns, or firearms used as a blunt weapon, e.g., “pistol whip.”  
131 We also excluded subsequent encounters for previous firearm injury and near misses.

132

## 133 **EMS-specific descriptive analyses**

134 After we completed the manual review and removed false positives, we conducted a descriptive  
135 analysis of EMS firearm encounters. We calculated counts and crude rates statewide and by EMS  
136 county by sex, race, ethnicity, and age group. We compared the intent as identified in the injury  
137 cause field to the intent assigned manually during the review process. We classified EMS  
138 encounters by injury cause code into assault, intentional self-harm/suicide, unintentional,  
139 undetermined, and a final category of non-firearm injury cause codes. If the EMS encounter  
140 record included two conflicting firearm injury cause codes, we classified the encounter based on  
141 the first code listed.

142

## 143 **EMS-ED linkage**

144 The EMS encounters from January 1, 2021 through December 31, 2022 meeting the EMS firearm  
145 v1 definition were linked, when possible, to the corresponding ED visit record and provided to the  
146 authors for analysis on October 19, 2023. The linkage used an existing hierarchical deterministic  
147 process to match records based on drop-off time by EMS, arrival time in the ED, EMS destination

148 name, EMS destination type, patient date of birth, sex and race/ethnicity, ED facility name, and  
149 ED transport mode [8]. The linkage rules use the same variables across multiple steps with  
150 different matching criteria to maximize the number of linkages while minimizing false linkages.  
151 Several updates were made to the linkage process as part of this analysis to increase the  
152 likelihood of a successful linkage; we updated the EMS encounter destination type required for  
153 linkage to include missing and *Freestanding Emergency Department* destination types as well as  
154 *Hospital-Emergency Department*. We also allowed records in the linkage process with missing  
155 race and updated the free text list of hospital names used by EMS agencies in the Destination  
156 Name field to include additional aliases and misspellings, increasing that list from 3213 to 5739  
157 entries.

158

### 159 **EMS-ED linkage descriptive analyses**

160 We determined the number and percentage of linked EMS records to corresponding ED visits  
161 and compared the EMS manually assigned intent to the intent in the ED visit data as identified by  
162 ED firearm injury intent definitions developed by the Centers for Disease Control and Prevention  
163 (CDC) and implemented in NC DETECT [9, 10].

164

## 165 **Results and discussion**

166

167 We identified 9557 EMS encounters from January 1, 2021, through December 31, 2022 meeting  
168 our firearm injury definition. Of these, 969 (10%) were identified as false positives and four records  
169 were duplicates, leaving 8584 EMS encounters for this analysis.

170

### 171 **False positive analysis**



172 We grouped the 969 false positives we observed in our data into seven categories, as shown in  
173 Table 2. We then analyzed the false positives to inform improvements to our EMS firearm injury  
174 definition.

175 **Table 2. EMS Syndrome Definition False Positive Categories.**

| <b>False Positive Category</b>                                                                        | <b>Count (%)</b> |
|-------------------------------------------------------------------------------------------------------|------------------|
| Other types of injuries or other types of false positives that could not be categorized               | 222 (22.9%)      |
| Pistol whips with no penetrating firearm discharge injury                                             | 185 (19.1%)      |
| Subsequent encounters for a previous firearm injury                                                   | 173 (17.9%)      |
| Firearm injuries by bb guns, pellet guns, air guns, nail guns, etc.                                   | 121 (12.5%)      |
| Near misses, e.g., injuries sustained near gunshots but with no evidence of direct injury by a bullet | 113 (11.7%)      |
| Mental health concerns without firearm injury                                                         | 92 (9.5%)        |
| Stabbings                                                                                             | 63 (6.5%)        |

176  
177 The largest number of false positives, 22.9% (n = 222) fell into the *other types of injuries* category,  
178 which included EMS encounters with no documented firearm discharge and other types of  
179 assault. Pistol whips were also a common source of false positives; 173 (93.5%) of these had a  
180 firearm injury cause code, typically *Assault by unspecified firearm discharge (X95.9)*, even though  
181 there was no documented firearm discharge injury in the EMS record. We often identified  
182 subsequent encounters (n = 173, 17.9%) in the EMS narrative text; 80 (46.2%) of these  
183 subsequent encounter records had a firearm discharge injury cause code. Injuries sustained near  
184 gunshots but with no evidence of direct injury by a bullet, e.g., injuries sustained by falls running  
185 away from gunshots, lacerations sustained from broken glass caused by bullets hitting  
186 windshields and windows, etc., comprised 11.7% (n = 113) of false positives. Examples of the 92  
187 encounters (9.5%) that fell into the mental health category included family members of firearm  
188 injury victims who had a mental health crisis after the firearm injury event, suicidal patients with  
189 firearms who did not suffer firearm injury, patients with mental health conditions claiming firearm  
190 injury with no identified firearm injury, and patients with substance misuse claiming firearm injury  
191 with no identified firearm injury. The 63 (6.5%) stabbing-related false positives resulted primarily  
192 from including the *Stab/Gunshot Wound/Penetrating Trauma* dispatch complaint in our definition

193 and this dispatch complaint text being repeated in the narrative text. Based on our false positive  
194 analysis, we hypothesize that the addition of chief complaint exclusion terms used in the CDC-  
195 developed ED firearm definition may improve our EMS firearm definition [9]. Additionally,  
196 exclusion terms that address false positives, e.g., pistol whips, even when the encounter has a  
197 firearm discharge injury cause code, will require logic that applies these exclusion terms to  
198 encounters with firearm discharge injury cause codes in addition to exclusion terms specific to  
199 the complaint and narrative free text fields.

200

## 201 **EMS descriptive analyses**

202 The primary cause of firearm related injury in 2021-2022 EMS encounter data was assault, which  
203 encompassed 51.8% (n = 4446) of all recorded events, followed by undetermined (n = 1694;  
204 19.7%), intentional self-harm (n = 1581;18.4%), and unintentional (n = 862; 10.1%). The ICD-10-  
205 CM injury intent coding does not classify unintentional and undetermined firearm injury by  
206 perpetrator, but our manual intent coding revealed that 7.3% (n = 634) of EMS firearm encounters  
207 were for unintentional self-inflicted injury, e.g., persons shooting themselves while cleaning,  
208 holstering, storing, retrieving, stepping on and/or dropping firearms. This finding presents an  
209 opportunity to inform unintentional firearm injury prevention messaging with specific scenarios.  
210 For example, public health messaging could remind firearm owners to clean their firearms while  
211 sober, and to store their firearms unloaded.

212

## 213 **Fig 1. EMS Firearm Injuries by shooter and intent**

214

215

## 216 **EMS demographic analysis**

217 We categorized firearm injury intent by key demographics, revealing several important differences  
218 by sex, age group, and race/ethnicity, as shown in Table 3. Notably, EMS firearm injuries were

219 more than 7.0 times more likely to occur among males in comparison to females. Males were also  
220 4.7 times more likely to be involved in an assault-related firearm injury and 6.2 times more likely  
221 to be involved in an intentional self-inflicted firearm injury compared to females. With respect to  
222 age group, the highest rate of firearms related assaults was among those aged 19 to 24 (112.77  
223 events per 100,000), followed by those aged 15 to 18 (92.90 events per 100,000). In contrast,  
224 those aged 65+, followed closely by those aged 19 to 24 years of age, were more likely to be  
225 involved in an intentional self-inflicted firearm injury, with rates of 23.31 per 100,000 and 19.28  
226 per 100,000, respectively. For race/ethnicity, Black or African Americans were 13.3 times more  
227 likely to be involved in a firearm injury related to assault in comparison to White persons, while  
228 White persons had the highest rate of intentional self-inflicted firearm injury, highlighting the  
229 disparities among these two demographic groups. Notably, American Indian/Alaskan Native  
230 (AIAN) persons had the second highest assault firearm injury rate, which was nearly four times  
231 higher than Whites, at 41.43 per 100,000.

232 These results highlight the importance of targeted interventions. For example, holistic  
233 interventions that target middle-school and high-school age students could result in significant  
234 reductions in assault and intentional self-harm events. Recent efforts focused on establishing  
235 universal firearms risk injury screening in care settings for adolescents and youths [11], as well  
236 as developing a better understanding of firearm access among this group [12], may help drive  
237 preventative mechanisms in this area. Interventions that examine the underlying causes of the  
238 increasing rates of intentional self-harm among those aged 65+ [13], might lead to interventions  
239 such as increased health care provider communication and policies that address firearms access  
240 to those with signs of dementia and/or depression [14, 15]. Finally, holistic efforts to address the  
241 disparities that exist among different racial and ethnic groups with higher rates of firearm-related  
242 injury events [16] would be an important step forward for reducing injuries among these groups.

244 **Table 3. EMS Firearm Injury Demographics, by Count and Crude Rate.<sup>a</sup>**

| <b>Demographic</b>             | <b>Assault</b>   | <b>Intentional Self-Harm</b> | <b>Undetermined</b> | <b>Unintentional</b> | <b>All Intents</b> |
|--------------------------------|------------------|------------------------------|---------------------|----------------------|--------------------|
| Total                          | 4446<br>(39.17)  | 1581<br>(13.93)              | 1694<br>(14.93)     | 863<br>(7.60)        | 8584<br>(75.64)    |
| <b>Sex</b>                     |                  |                              |                     |                      |                    |
| Male                           | 3621<br>(70.34)  | 1342<br>(26.07)              | 1403<br>(27.25)     | 743<br>(14.43)       | 7109<br>(138.09)   |
| Female                         | 808<br>(14.77)   | 230<br>(4.21)                | 270<br>(4.90)       | 112<br>(2.05)        | 1420<br>(25.99)    |
| Unknown/Missing                | 17               | 9                            | 21                  | 8                    | 55                 |
| <b>Age Group</b>               |                  |                              |                     |                      |                    |
| Infant/Preschool<br>(0-4)      | 19<br>(3.20)     | 0<br>(0.00)                  | 20<br>(3.37)        | 26<br>(4.37)         | 65<br>(10.93)      |
| Elementary School<br>(5-9)     | 23<br>(3.80)     | 0<br>(0.00)                  | 19<br>(3.14)        | 14<br>(2.31)         | 56<br>(9.25)       |
| Middle School<br>(10-14)       | 86<br>(13.23)    | 22<br>(3.38)                 | 36<br>(5.54)        | 32<br>(4.92)         | 176<br>(27.07)     |
| High School<br>(15-18)         | 515<br>(92.90)   | 66<br>(11.91)                | 199<br>(35.90)      | 53<br>(9.56)         | 833<br>(150.26)    |
| College<br>(19-24)             | 1012<br>(112.77) | 173<br>(19.28)               | 354<br>(39.45)      | 175<br>(19.50)       | 1714<br>(190.99)   |
| Young Adult<br>(25-44)         | 2074<br>(75.25)  | 434<br>(15.75)               | 751<br>(27.25)      | 311<br>(11.28)       | 3579<br>(129.54)   |
| Middle Aged<br>(45-64)         | 580<br>(21.41)   | 443<br>(16.35)               | 229<br>(8.45)       | 155<br>(5.72)        | 1407<br>(51.93)    |
| Senior<br>(65+)                | 91<br>(4.93)     | 430<br>(23.31)               | 51<br>(2.76)        | 90<br>(4.88)         | 662<br>(35.88)     |
| Unknown/Missing                | 46               | 13                           | 35                  | 7                    | 101                |
| <b>Race/Ethnicity</b>          |                  |                              |                     |                      |                    |
| American Indian/Alaskan Native | 74<br>(41.43)    | 6<br>(3.36)                  | 61<br>(34.15)       | 12<br>(6.72)         | 153<br>(85.67)     |
| Asian/Pacific Islander         | 22<br>(5.63)     | 17<br>(4.35)                 | 7<br>(1.79)         | 11<br>(2.82)         | 57<br>(14.59)      |
| Black or African American      | 3103<br>(139.28) | 211<br>(9.47)                | 1020<br>(45.78)     | 266<br>(11.94)       | 4600<br>(206.47)   |
| Hispanic or Latino             | 281<br>(24.24)   | 56<br>(4.83)                 | 89<br>(7.68)        | 45<br>(3.88)         | 471<br>(40.63)     |
| White                          | 801<br>(10.83)   | 1246<br>(16.85)              | 351<br>(4.75)       | 485<br>(6.56)        | 2883<br>(38.99)    |
| Unknown/Missing                | 165              | 45                           | 166                 | 44                   | 420                |

<sup>a</sup>Data are reported as count followed by rates per 100,000 persons within a given demographic in the state of North Carolina. For the total row, the total population was used for the denominator.

245  
246  
247  
248  
249

250

## 251 **Manual intent and injury cause code classification comparison**

252 Next, we compared our manually assigned intent classifications to the EMS injury cause codes  
253 (ICD-10-CM) alone. The results are shown in Table 4. There were 2358 firearm injury encounters  
254 (27.5%) that were missing an injury cause code. Of the remaining 6226 EMS encounters, our  
255 manual intent coding was comparable to the intent identified solely by the injury cause code.  
256 Although our manual intent classifications referenced the injury cause codes during review, these  
257 results suggest that EMS injury cause codes can serve as a reliable indicator of firearm injury  
258 intent when available.

259 **Table 4. Manual and Injury Cause Code Intent Classification Comparison, Count (Column**  
260 **%).**

| <b>Intent</b>                          | <b>Manual Injury Classification</b> | <b>EMS Injury Cause Code Classification*</b> |
|----------------------------------------|-------------------------------------|----------------------------------------------|
| <b>Assault</b>                         | 4446 (51.8%)                        | 3055 (49.1%)                                 |
| <b>Intentional Self - Harm/Suicide</b> | 1581 (18.4%)                        | 1111 (17.8%)                                 |
| <b>Unintentional</b>                   | 862 (10.1%)                         | 580 (9.3%)                                   |
| <b>Undetermined</b>                    | 1694 (19.7%)                        | 1211 (19.5%)                                 |
| <b>Multiple Intent Codes</b>           | ---                                 | 105 (1.7%)                                   |
| <b>Other (non-firearm)</b>             | --                                  | 164 (2.6%)                                   |
| <b>Total</b>                           | 8584 (100%)                         | 6226 (100%)                                  |

261 \*Missing = 2,358

262  
263 We further examined instances where our manual review did NOT match the intent as assigned  
264 by the EMS injury cause code. Our manual intent classifications did not agree with the assigned  
265 injury cause code intents for 773 EMS encounters, of which 641 (82.9%) were assigned an  
266 undetermined injury cause code. With manual review of the narrative text, we were able to assign  
267 436 of these to assault, followed by 156 to intentional self-harm and 49 to unintentional. The  
268 manual intent assignments resulted in more specific intent coding rather than a change of intent

269 for most EMS encounters. With an improvement in completeness, EMS injury cause codes alone  
270 can be a reliable source of intent-specific firearm injury surveillance.

## 271 EMS disposition

272 We also grouped the EMS firearm injury encounters by EMS disposition to document both the  
273 continuum of care for patients initially encountered by EMS, and to assess the potential for linking  
274 each event to ED visit data (Table 5). Most events were recorded as '*Patient Treated, Transported*  
275 *by this EMS Unit*' (n = 6054, 71%). A total of 1889 patients (22%) were dead at the scene from  
276 firearm injury, 67% (n = 1062) of which were from intentionally self-inflicted gunshot wounds. For  
277 intents other than intentional self-harm, the majority of EMS encounters for firearm injury result in  
278 EMS transport.

279 **Table 5. EMS Disposition by Intent by Count (Row %).**

| Intent                | All Encounters | Patient treated, transported by this EMS Unit | Patient Dead at Scene (with and without transport) | Other Disposition |
|-----------------------|----------------|-----------------------------------------------|----------------------------------------------------|-------------------|
| Assault               | 4446           | 3484 (78%)                                    | 602 (14%)                                          | 360 (8%)          |
| Intentional Self-Harm | 1581           | 467 (30%)                                     | 1062 (67%)                                         | 52 (3%)           |
| Unintentional         | 863            | 770 (89%)                                     | 15 (2%)                                            | 78 (9%)           |
| Undetermined          | 1694           | 1333 (79%)                                    | 210 (12%)                                          | 151 (9%)          |
| All Intents           | 8584           | 6054 (71%)                                    | 1889 (22%)                                         | 641 (7%)          |

280

## 281 EMS-ED linkage results

282 We then examined the linkage between the firearm injury events in our EMS analysis with ED  
283 data with the goal of comparing firearm injury intent across the two data sources. Of the 8854  
284 EMS encounters included in our analysis, 6054 had a disposition of '*Patient Treated, Transported*  
285 *by this EMS Unit*' and, of those, 5558 had a destination type of '*Hospital-Emergency Department*',  
286 '*Freestanding Emergency Department*' or '*Missing*', and 5353 of those were transported to an ED  
287 in NC DETECT (i.e., all civilian, acute care EDs in NC), based on a review of the free text

288 destination name. We were able to link 3401 (63.5%) of these EMS encounters to a corresponding  
 289 ED visit (Figure 2).

290 **Fig 2. EMS-ED linkage results**

291  
 292 For the EMS records that we successfully linked to an ED visit record (n = 3401), only  
 293 18.3% (n=355) of the assaults we identified in the EMS data (n=1945) were binned into the CDC  
 294 Firearm Assault v1 definition, and only 22.2% (n=38) of the intentional self-harm suicide  
 295 encounters (n=171) were binned into the CDC Firearm Intentional Self-Harm v1 definition. These  
 296 findings illustrate the challenges of accurate intent coding in the ED setting and the potential  
 297 impact of the CMS coding guidance that requires injury intent to default to unintentional if the  
 298 intent is not identified in the physician documentation [17]. They also suggest that EMS  
 299 encounters may serve as a better proximate for understanding intent for firearm injury than ED  
 300 data, given the current coding guidance. EMS encounters identified as firearm injuries that were  
 301 not identified as firearm injuries in the ED data often had trauma-related chief complaints and/or  
 302 had diagnosis codes for penetrating injuries without an external mechanism firearm ICD-10-CM  
 303 code.

304 **Table 6. Count (Row %) of EMS encounters linked to ED visits and binned into ED**  
 305 **Firearm Syndromes by EMS Manual Intent.<sup>a</sup>**

| <b>Intent of EMS records assigned by manual review</b> | <b>EMS Firearm Encounters linked to ED visits</b> | <b>ED CDC Firearm All Intents V2</b> | <b>ED CDC Firearm Assault V1</b> | <b>ED CDC Firearm Intentional Self-Harm V1</b> | <b>ED CDC Firearm Unintentional / Undetermined V1</b> | <b>Not binned into any ED firearm injury-related syndrome</b> |
|--------------------------------------------------------|---------------------------------------------------|--------------------------------------|----------------------------------|------------------------------------------------|-------------------------------------------------------|---------------------------------------------------------------|
| <b>Assault</b>                                         | 1945                                              | 1794<br>(92.2%)                      | 355<br>(18.3%)                   | 6<br>(0.3%)                                    | 1234<br>(63.4%)                                       | 151<br>(7.8%)                                                 |
| <b>Unintentional (self, other, or unknown shooter)</b> | 509                                               | 472<br>(92.7%)                       | 9<br>(1.8%)                      | 3<br>(0.59%)                                   | 378<br>(74.3%)                                        | 37<br>(7.3%)                                                  |
| <b>Intentional Self-Harm / Suicide</b>                 | 171                                               | 136<br>(79.5%)                       | 3<br>(1.8%)                      | 38<br>(22.2%)                                  | 77<br>(45.0%)                                         | 35<br>(20.4%)                                                 |

|                                                       |     |                |                |              |                |              |
|-------------------------------------------------------|-----|----------------|----------------|--------------|----------------|--------------|
| <b>Undetermined (self, other, or unknown shooter)</b> | 776 | 721<br>(92.9%) | 126<br>(16.2%) | 6<br>(0.77%) | 482<br>(62.1%) | 55<br>(7.1%) |
|-------------------------------------------------------|-----|----------------|----------------|--------------|----------------|--------------|

306 <sup>a</sup> An ED visit can be binned into 0,1 or more syndromes.

307

308 While this study did not include a comprehensive review of EMS encounters transported to an ED  
309 that were not successfully linked to an ED visit record, our review of missed linkages revealed  
310 that missing or inaccurate dates of birth represented a significant cause of missed linkages. For  
311 serious events such as firearm injury, a reliable date of birth may be challenging for EMS to record  
312 at the scene.

### 313 **ED disposition for EMS-ED linked encounters**

314 As shown in Table 7, 1721 (50.6%) of the ED visits linked to an EMS encounter had an ED  
315 disposition of discharged home, with 26.8% (n=913) admitted; 230 (6.8%) had a disposition of  
316 died in the ED. Of those who died in the ED, 76 (33%) were identified in the EMS encounter as  
317 intentional self-harm, and 103 (44.8%) as assault. These data indicate the overall severity of  
318 firearm injury and the lethality of firearms when used with intent to inflict injury. Only 2 (0.8%)  
319 deaths in the ED were for EMS identified unintentional firearm injuries.

320 **Table 7. ED Disposition for EMS-ED linkage.**

| <b>ED Disposition for EMS-ED Linked Data</b>                  | <b>Count (%)</b> |
|---------------------------------------------------------------|------------------|
| Discharged to home or self-care (routine discharge)           | 1721 (50.6%)     |
| Admitted to Hospital                                          | 913 (26.8%)      |
| Died                                                          | 230 (6.8%)       |
| Transferred/discharged to another short-term general hospital | 249 (6.5%)       |
| Transferred/discharged to another type of care setting        | 65 (1.9%)        |
| Transferred/discharged to prison or jail                      | 54 (1.6%)        |
| Left AMA / Discontinued Care                                  | 36 (1.1%)        |
| Unknown/Missing                                               | 133 (3.9%)       |
| Total                                                         | 3401 (100%)      |

321

## 322 **Limitations**



323 The analysis presented in this report has several limitations. When manually coding intent, we  
324 relied on the EMS narrative but if the reporting of the incident intent to or by EMS was inaccurate,  
325 then the resulting intent coding may be inaccurate. For example, if the patient stated that they  
326 were shot in a drive-by shooting we coded this EMS encounter as an assault, but the patient may  
327 have unintentionally shot themselves and reported it as a drive-by shooting. In addition, our  
328 descriptive analysis included both nonfatal and fatal EMS encounters. While this reflects the  
329 comprehensive EMS data for firearm injury, certain findings may be different when analyzing  
330 nonfatal and fatal EMS firearm injury encounters separately. Finally, most of the EMS encounters  
331 in this analysis were reviewed by only one reviewer; intent classifications may have been  
332 assigned differently by a different reviewer.

333

## 334 **Conclusions**

335 Timely and accurate injury cause codes are crucial for understanding the nature and scope of  
336 firearm-related injuries. In this study, we manually assigned intent to 8584 eligible NC EMS  
337 encounters from 2021 and 2022 to better understand the landscape of EMS-related firearm injury  
338 calls and to assess the accuracy of firearm injury coding in the ED setting. Manual coding of the  
339 data for shooter and intent revealed comparable results to those obtained from examining EMS  
340 assigned injury cause code classifications, when available. Of the 63.5% encounters (n = 3401)  
341 that could be linked to ED visit data, 1,945 of those were coded in the EMS data as assaults  
342 (57.2%). However, only 18.3% (n = 355) of those encounters were classified as assaults based  
343 on the ED CDC Assault v1 definition. Similarly, of the 171 encounters coded as intentional self-  
344 harm suicide encounters in the EMS, only 22.2% (n = 38) were binned to the CDC Firearm  
345 Intentional Self-Harm v1 definition. The ED data likely reflects current CMS coding guidance that

346 requires injury intent to default to unintentional if the intent is not identified in the physician  
347 documentation [17].

348         The outcomes of our study reveal that EMS encounter data may be useful for obtaining  
349 more granular data from the scene of the injury incident. Such data might be important for  
350 developing tailored approaches that reflect regional and demographic differences in firearms  
351 injuries. In contrast, the lack of such detailed information in the ED visit data may limit such  
352 interventions. For example, if an encounter is the result of an assault, but it is coded as  
353 unintentional or undetermined, a patient may not be flagged for post-discharge follow-up that is  
354 directed towards supporting victims of assault. Combined, the results of this work illustrate the  
355 importance of accurate intent coding for firearms injuries and provides a foundation for the  
356 discussion of better coding guidance in the ED setting.

357

## 358 **Acknowledgements**

359

360 The North Carolina Disease Event Tracking and Epidemiologic Collection Tool (NC DETECT) is  
361 an advanced, statewide public health surveillance system. NC DETECT is supported by the North  
362 Carolina Division of Public Health through a federal Public Health Emergency Preparedness  
363 Grant and is managed through a collaboration between NC DPH and the University of North  
364 Carolina at Chapel Hill Department of Emergency Medicine's Carolina Center for Health  
365 Informatics. The findings and conclusions in this publication are those of the author(s) and do not  
366 necessarily represent the views of the North Carolina Department of Health and Human Services,  
367 Division of Public Health.

368

369 The NC OEMS and the NC EMS Data System supports state, regional and local EMS and  
370 healthcare related service delivery from a patient care, resource allocation, and regulatory  
371 perspective. This manuscript was not prepared in collaboration with investigators of the NC EMS

372 Data System and does not necessarily reflect the opinions or views of the NC OEMS, ESO or the  
373 study sites participating in the NC EMS Data System.

374

375 The authors also wish to thank Matthew Kerber for his work on the EMS-ED linkage components  
376 of this study.

377

## 378 **References**

379

- 380 1. Barber C, Cook PJ, Parker ST. The emerging infrastructure of US firearms injury  
381 data. *Preventive Medicine*. 2022;165:107129.
- 382 2. Keeping Families and Communities Safe: Public Health Approaches to Reduce  
383 Violence and Firearm Misuse Leading to Injury and Death [White Paper]. 2022.
- 384 3. Cook PJ, Parker ST. Correcting Misinformation on Firearms Injuries. *JAMA Netw*  
385 *Open*. 2022;5(12):e2246434.
- 386 4. NC-FASTER Reports. Carolina Center for Health Informatics in the Department of  
387 Emergency Medicine, University of North Carolina at Chapel Hill & NC Division of  
388 Health and Human Services, Division of Public Health. 2023. [https://ncdetect.org/nc-](https://ncdetect.org/nc-faster-firearm-quarterly-reports/)  
389 [faster-firearm-quarterly-reports/](https://ncdetect.org/nc-faster-firearm-quarterly-reports/).
- 390 5. Miller M, Azrael D, Yenduri R, Barber C, Bowen A, MacPhaul E, et al. Assessment of  
391 the Accuracy of Firearm Injury Intent Coding at 3 US Hospitals. *JAMA Netw Open*.  
392 2022;5(12):e2246429.
- 393 6. MacPhaul E, Zhou L, Mooney SJ, Azrael D, Bowen A, Rowhani-Rahbar A, et al.  
394 Classifying Firearm Injury Intent in Electronic Hospital Records Using Natural  
395 Language Processing. *JAMA Netw Open*. 2023;6(4):e235870.
- 396 7. Hakenewerth AM, Waller AE, Ising AI, Tintinalli JE. North Carolina Disease Event  
397 Tracking and Epidemiologic Collection Tool (NC DETECT) and the National Hospital  
398 Ambulatory Medical Care Survey (NHAMCS): comparison of emergency department  
399 data. *Academic emergency medicine*. 2009;16(3):261-9.
- 400 8. Fix J, Ising AI, Proescholdbell SK, Falls DM, Wolff CS, Fernandez AR, et al. Linking  
401 Emergency Medical Services and Emergency Department Data to Improve  
402 Overdose Surveillance in North Carolina. *Public Health Rep*.  
403 2021;136(1\_suppl):54S-61S.
- 404 9. Zwald ML, Holland KM, Bowen DA, Simon TR, Dahlberg LL, Stein Z, et al. Using the  
405 Centers for Disease Control and Prevention's National Syndromic Surveillance  
406 Program Data to Monitor Trends in US Emergency Department Visits for Firearm  
407 Injuries, 2018 to 2019. (1097-6760 (Electronic)).
- 408 10. Emergency Department Syndrome & Custom Event Definitions. Carolina Center for  
409 Health Informatics in the Department of Emergency Medicine, University of North  
410 Carolina at Chapel Hill & NC Division of Health and Human Services, Division of  
411 Public Health. 2023. <https://ncdetect.org/case-definitions/>

- 412 11. Ngo QM, Sigel E, Moon A, Stein SF, Massey LS, Rivara F, et al. State of the  
413 science: a scoping review of primary prevention of firearm injuries among children  
414 and adolescents. *Journal of Behavioral Medicine*. 2019;42(4):811-29.
- 415 12. Fleegler EW. Our Limited Knowledge of Youth Suicide Risk and Firearm Access.  
416 *JAMA Network Open*. 2021;4(10):e2127965-e.
- 417 13. El Ibrahimy S, Xiao Y, Bergeron CD, Beckford NY, Virgen EM, Smith ML. Suicide  
418 Distribution and Trends Among Male Older Adults in the U.S., 1999-2018. *Am J Prev*  
419 *Med*. 2021;60(6):802-11.
- 420 14. Morgan ER, Gomez A, Rivara FP, Rowhani-Rahbar A. Household Firearm  
421 Ownership and Storage, Suicide Risk Factors, and Memory Loss Among Older  
422 Adults: Results From a Statewide Survey. *Annals of Internal Medicine*.  
423 2019;171(3):220-2.
- 424 15. Mulcahy LB, Goyal MK, Cohen J. Documentation of Firearm Safety Screening  
425 During Emergency Department Visits for Assault-Related Injury. *Health Promotion*  
426 *Practice*. 2021;23(6):941-3.
- 427 16. Akinyemi OA, Weldeslase TA, Hughes K, Williams M, Cornwell EE. The Distressed  
428 Communities Index: A Measure of Community-Level Economic Deprivation and Rate  
429 of Firearm Injuries in Maryland. *The American Surgeon*<sup>TM</sup>.  
430 2023:00031348231191243.
- 431 17. ICD-10-CM Official Guidelines for Coding and Reporting: FY 2023 -- UPDATED April  
432 1, 2023. 2023. [https://www.cms.gov/files/document/fy-2023-icd-10-cm-coding-](https://www.cms.gov/files/document/fy-2023-icd-10-cm-coding-guidelines-updated-01/11/2023.pdf)  
433 [guidelines-updated-01/11/2023.pdf](https://www.cms.gov/files/document/fy-2023-icd-10-cm-coding-guidelines-updated-01/11/2023.pdf)

434

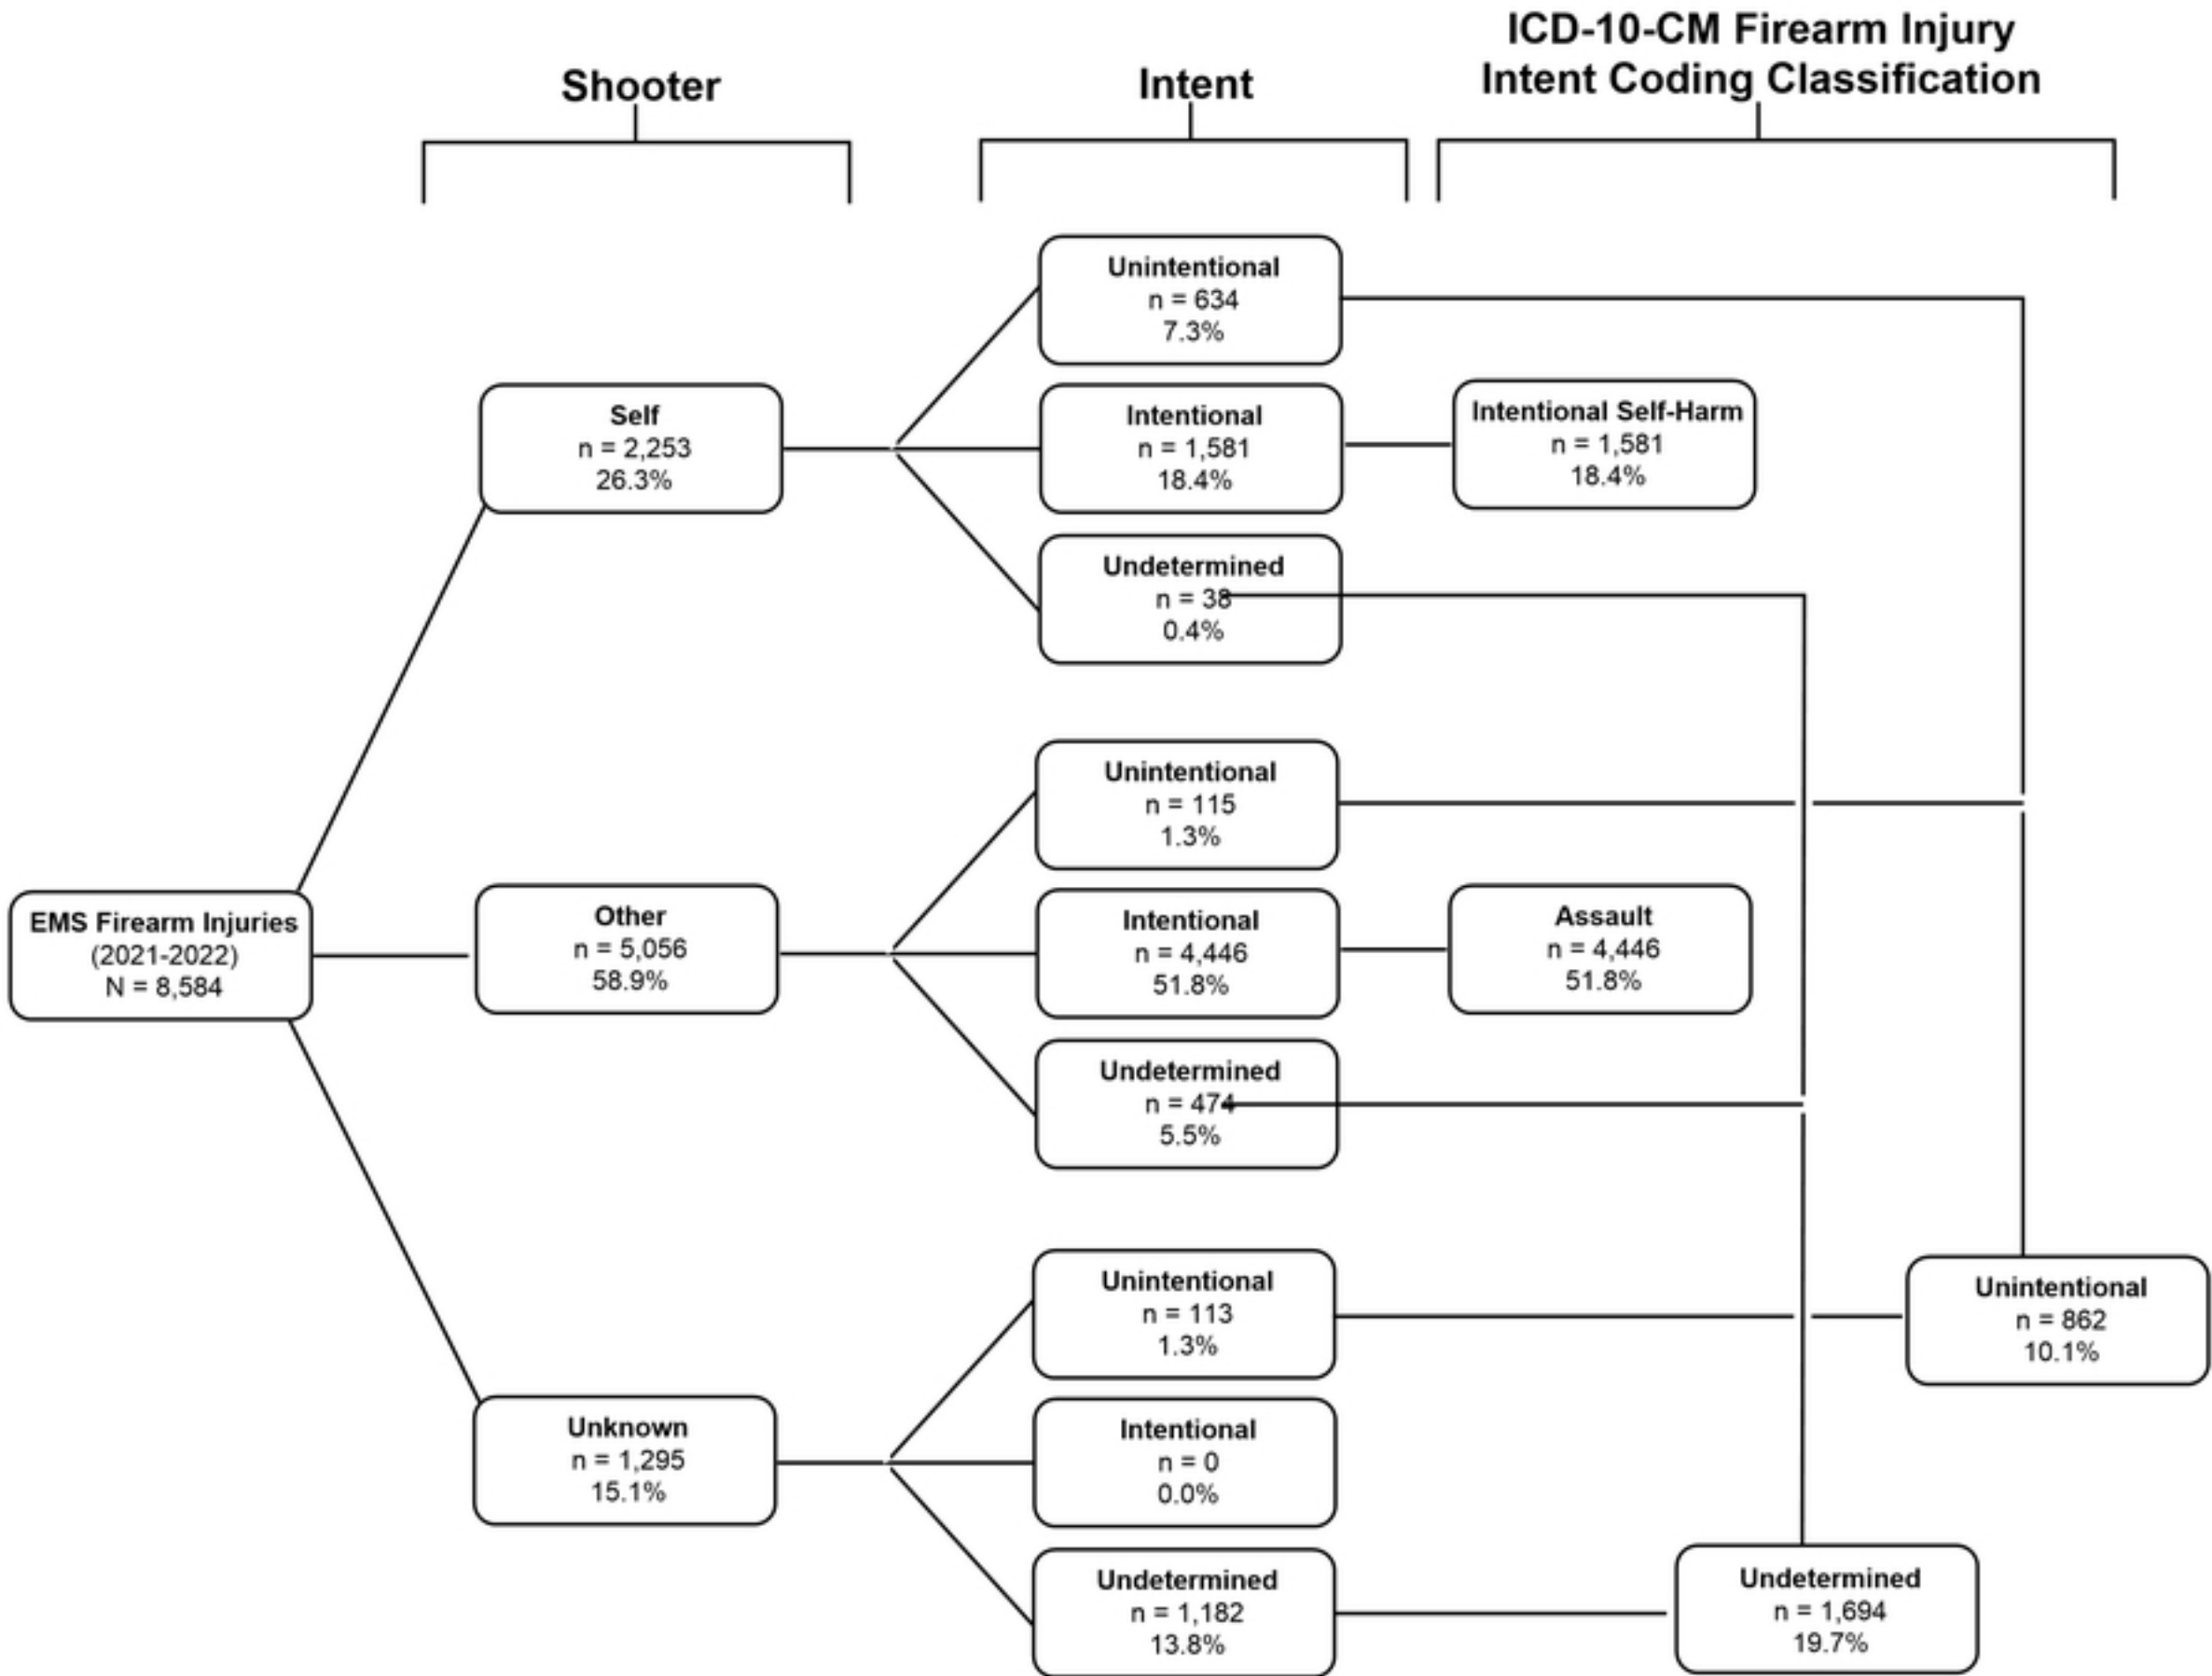

Fig 1

# EMS Firearm Injuries

(2021-2022)

N = 8,584

(See Figure 1)

## Treated and Transported by an EMS Unit

n = 6,054

(70.5%)

medRxiv preprint doi: <https://doi.org/10.1101/2023.11.21.23298854>; this version posted November 22, 2023. The copyright holder for this preprint (which was not certified by peer review) is the author/funder, who has granted medRxiv a license to display the preprint in perpetuity.

It is made available under a [CC-BY 4.0 International license](https://creativecommons.org/licenses/by/4.0/).

## Destination type of Hospital ED, Freestanding ED, or Missing

eligible for linkage to an ED in NC DETECT

n = 5,353

(88.4%)

## Successfully Linked to ED

n = 3,401

(63.5%)

Fig 2
